# Supplementary material for: Can valence and origin of emotional words influence the assessments of ambiguous stimuli in terms of warmth or competence?
Source: PeerJ. 2021 Jan 26;9:e10488. doi: 10.7717/peerj.10488 (PMC7845528; doi:10.7717/peerj.10488)
Supplement: Supplemental Information 1 — Words (in Polish and English) and values are paired with the code of the group as letter and number for manipulated factors: Origin automatic (A, 1) or reflective (R, 3); Valence negative (Neg, 1), neutral (Neu, 2) or positive (Pos, 3) (Sheet 1). Sheet 2 contains mean values of manipulated and controlled factors for each group. Sheet 3 contains results of comparisons between groups (ANOVAs). [file peerj-09-10488-s001.xlsx]

## Sheet: Word properties
Polish word	English translation	Category number	Category name	valence level	origin level	Valence M	Origin M	Arousal M	Concreteness M	Freqeuncy of appearance [51]	NoL
czkawka	hiccup	1	ANeg	1	1	4.04	4.54	3.86	3.18	79	7
szloch	sob	1	ANeg	1	1	3.04	3.58	4.7	3.68	735	6
łzy	tears	1	ANeg	1	1	3.66	3.38	4.54	2.08	660	3
uszczypnięcie	pinch	1	ANeg	1	1	4.06	4.38	4.38	3.44	24	13
pijak	drunk	1	ANeg	1	1	2.76	4.98	5.4	2.84	467	5
naiwniak	sucker	1	ANeg	1	1	3.38	4.16	3.84	5.4	23	8
słabeusz	weakling	1	ANeg	1	1	3.18	4.98	3.58	5.38776	32	8
zmęczenie	fatigue	1	ANeg	1	1	3.28	4.9	3.5	5.56	2044	9
hałas	noise	1	ANeg	1	1	3.56	4.74	4.6	4.18	3199	5
plotka	rumor	1	ANeg	1	1	3.5	4.78	4.48	5.04	588	6
grymas	grimace	1	ANeg	1	1	3.76	4.42	4.52	4.2	1618	6
gafa	blunder	1	ANeg	1	1	3.66	4.42	4.58	5.18367	23	4
usidlenie	ensnaring	1	ANeg	1	1	3.88	4.9	4.52	5.38	9	9
smarkacz	stripling	1	ANeg	1	1	3.36	4.88	4.64	3.46	265	8
zaślepienie	infatuation	1	ANeg	1	1	3.32	3.66	4.4	5.64	75	11
procesja	procession	2	ANeu	2	1	4.76	4.88	3.5	3.5625	293	8
kościół	church	2	ANeu	2	1	5.24	4.46	3.54	3.78	3652	7
kuksaniec	nudge	2	ANeu	2	1	4.53191	4.55319	4.1	3.02128	13	9
tarot	tarot	2	ANeu	2	1	4.16	4.9	3.72	3.92	38	5
loteria	lottery	2	ANeu	2	1	5.76	4.7	4.1	3.46	56	7
westchnienie	sigh	2	ANeu	2	1	5.48	4.28	3.6	4.44	1336	12
jałmużna	alms	2	ANeu	2	1	4.36	4.84	4.04	3.92	44	8
błazen	clown	2	ANeu	2	1	4.64	4.62	4.28	3.26	507	6
mrowienie	tingling	2	ANeu	2	1	4.26	4.9	3.96	4.38776	482	9
pragnienie	desire	2	ANeu	2	1	5.14	3.4	5.18	5.8	4066	10
obrzęd	rite	2	ANeu	2	1	5.04082	4.76	3.66	4.9	220	6
wróżka	fairy	2	ANeu	2	1	5.6	4.68	4.18	4.3	338	6
młodzież	youth	2	ANeu	2	1	5.68	4.5	4.66	3.4	1703	8
łasuch	gourmand	2	ANeu	2	1	5.74	4.72	4.4	4	9	6
burza	storm	2	ANeu	2	1	4.86	4.54	5.3	3.06	3238	5
zakochanie	infatuation	3	APos	3	1	7.56	2.28	6.5	7.24	52	10
passa	streak	3	APos	3	1	6.16	4.84	4.36	5.78	41	5
toast	toast	3	APos	3	1	6.36	4.6	4.3	3.92	689	5
powitanie	welcome	3	APos	3	1	6.5	4.96	3.9	4.7	1825	9
zapach	fragrance	3	APos	3	1	6.8	4.66	3.7	4.28	9963	6
słodycz	sweetness	3	APos	3	1	7.02	4.44	4.14	3.54	477	7
pomoc	help	3	APos	3	1	6.84	4.48	3.54	5.06122	10180	5
niemowlak	infant	3	APos	3	1	6.5	3.86	3.7	2.5	28	9
flirt	dalliance	3	APos	3	1	6.46	3.36	5.52	5.72	146	5
potomstwo	offspring	3	APos	3	1	6.62	4.6	3.68	3.36	504	9
pozdrowienie	greeting	3	APos	3	1	6.72	4.6	3.58	5.4	364	12
skarb	treasure	3	APos	3	1	6.84	4.76	4.2	3.72	2460	5
walentynka	valentine	3	APos	3	1	6.42	4.26	4.66	4.24	2	10
podarunek	gift	3	APos	3	1	6.78	4.44	4.3	3.56	373	9
ferie	holiday	3	APos	3	1	7.1	4.82	4.12	4.14	123	5
wina	fault	4	ONeg	1	2	3.46	5.18	4.52	5.78	9887	4
ciemnota	unacquaintance	4	ONeg	1	2	3.16	5.38	4.34	5.40816	87	8
truchło	carcass	4	ONeg	1	2	3.5625	5.15909	3.97727	2.90476	68	7
dół	pit	4	ONeg	1	2	4.04	5.52	4.02	3.28	24000	3
ochłap	offal	4	ONeg	1	2	3.28	5.60417	3.79592	3.72	118	6
breja	slush	4	ONeg	1	2	3.4898	5.89583	4.10204	3.10638	43	5
paszkwil	libel	4	ONeg	1	2	3.56818	5.47727	4.5122	5.38462	69	8
kuternoga	hobbler	4	ONeg	1	2	3.76596	5.06818	4.13333	2.95833	37	9
reumatyzm	rheumatism	4	ONeg	1	2	2.96	5.9	3.72	3.96	211	9
biedak	wretch	4	ONeg	1	2	3.48	5.18	4.16	3.22	794	6
śpiączka	coma	4	ONeg	1	2	2.44	5.36	4.02	3.7	53	8
obtarcie	sore	4	ONeg	1	2	3.46	5.06122	4.22	3.2	7	8
błąd	error	4	ONeg	1	2	3.38	5.46	4.34	5.68	5631	4
łachmany	rags	4	ONeg	1	2	3.26	4.98	4.3	3.04	387	8
wada	drawback	4	ONeg	1	2	3.3	5.86	4.12	5.36	211	4
doping	cheering	5	ONeu	2	2	5.24	5.12	5.18	4.46	23	6
chór	choir	5	ONeu	2	2	5.71429	5.4	3.54	2.78	1267	4
kłębek	hank	5	ONeu	2	2	5.4	5.72	3.58	2.68	1093	6
telewizja	television	5	ONeu	2	2	5.24	5.74	3.54	3.14	529	9
guru	guru	5	ONeu	2	2	4.94	6.04	4	5.56	199	4
wódka	vodka	5	ONeu	2	2	5.6	5.1	5.76	1.58	568	5
unik	dodge	5	ONeu	2	2	4.96	5.48	4.42	4.38	461	4
czara	goblet	5	ONeu	2	2	5.47917	5.42857	3.68	2.64583	214	5
smok	dragon	5	ONeu	2	2	5.66	5.14	4.58	4.18	3438	4
blef	bluff	5	ONeu	2	2	4.1	5.52	4.28	5.64	136	4
żargon	jargon	5	ONeu	2	2	4.94	5.65306	3.66667	5.02083	174	6
głębia	depth	5	ONeu	2	2	5.26	5.38	3.74	5.48	243	6
farsa	farce	5	ONeu	2	2	3.97959	5.08	4.54	5.54167	144	5
grono	bunch	5	ONeu	2	2	5.6	5.7	3.6	3.3	574	5
pisarz	writer	5	ONeu	2	2	5.74	5.92	3.76	2.98	2412	6
przyjęcie	party	6	OPos	3	2	6.78	4.96	4.54	3.88	3452	9
rejs	cruise	6	OPos	3	2	6.44	5.4	3.64	3.06	689	4
powiew	waft	6	OPos	3	2	6.1	5.44898	3.5	3.66	1391	6
promocja	promotion	6	OPos	3	2	6.7	5.68	4.56	4.68	61	8
klimat	climate	6	OPos	3	2	6.06	5.86	3.86	3.9	824	6
gość	guest	6	OPos	3	2	6.42	5.38	3.76	3.28	4380	4
brawa	applause	6	OPos	3	2	6.68	4.76	4.8	4.4	1053	5
kreskówka	cartoon	6	OPos	3	2	6.82	5.14	3.96	3.04	2	9
melodia	melody	6	OPos	3	2	6.88	5.24	3.46	4.5	750	7
wydarzenie	event	6	OPos	3	2	5.86	5.9	4.54	4.52	1417	10
smak	taste	6	OPos	3	2	6.32	5.04	3.56	4.54	2946	4
południe	south	6	OPos	3	2	6.04	5.1	3.58	4.24	9135	8
malarstwo	painting	6	OPos	3	2	6.12	5.24	3.58	4.38	321	9
wyzwanie	challenge	6	OPos	3	2	6.24	5.34	4.66	5.92	1521	8
obrońca	defender	6	OPos	3	2	6.3	5.88	4.64	4.4898	564	7
egzaminy	exams	7	RNeg	1	3	3.6	7.02	5.6	3.84	340	8
ignorancja	ignorance	7	RNeg	1	3	2.98	6.14	4.68	6.44	140	10
krata	grate	7	RNeg	1	3	3.98	6.16	3.6	1.74	357	5
minus	minus	7	RNeg	1	3	3.84	6.36	3.52	4.9	554	5
szpieg	spy	7	RNeg	1	3	3.92	6.72	4.2	3.3	637	6
koszty	costs	7	RNeg	1	3	3.78	6.4	4.08	3.88	1134	6
podwładny	subordinate	7	RNeg	1	3	4.12	6.28	4.02	4.06	189	9
podatek	tax	7	RNeg	1	3	3.32	6.92	4.22	3.6	228	7
alimenty	alimony	7	RNeg	1	3	3.6	6.34	4.48	3.42	82	8
odsetki	interest	7	RNeg	1	3	3.78	6.56	4.36	3.8	58	7
rząd	government	7	RNeg	1	3	3.8	6.5	4.5	3.64	5596	4
przemyt	smuggling	7	RNeg	1	3	3.7	6.68	4.6	4	180	7
recesja	recession	7	RNeg	1	3	3.625	6.64583	4.20408	5.13333	25	7
bezrobocie	unemployment	7	RNeg	1	3	2.92	6.06	4.2	5.4	122	10
heretyk	heretic	7	RNeg	1	3	3.93878	6.10417	4.58	5.42	45	7
szlachta	nobility	8	RNeu	2	3	5.46	6.22	4.08	3.9	811	8
etykieta	label	8	RNeu	2	3	4.9	6.6	3.52	3.08	126	8
sułtan	sultan	8	RNeu	2	3	5.1	6.83673	3.46	3.1	397	6
zadatki	makings	8	RNeu	2	3	5.32	5.98	3.8	5.34	94	7
prawo	right	8	RNeu	2	3	5.84	7.6	3.68	5.96	19169	5
prasa	press	8	RNeu	2	3	5.3	6.64	3.5	2.83673	1232	5
stawka	bid	8	RNeu	2	3	5.42	6.28	4.42	4.02	301	6
raport	report	8	RNeu	2	3	4.88	6.98	3.56	2.84	2634	6
wojsko	army	8	RNeu	2	3	4.94	6.62	4.96	2.9	2893	6
interes	business	8	RNeu	2	3	5.86	7.1	4.36	4.82	3421	7
dyscyplina	discipline	8	RNeu	2	3	5.46	6.44	3.96	5.74	384	10
wynik	result	8	RNeu	2	3	5.52	6.7	4.6	4.58	1919	5
weto	veto	8	RNeu	2	3	4.40816	6.62	4.02	5.57143	19	4
hodowla	breeding	8	RNeu	2	3	5.56	6.12	3.62	2.82	131	7
kurs	course	8	RNeu	2	3	5.48	6.66	3.48	3.82	2801	4
miliard	billion	9	RPos	3	3	7.08	7.06	4.68	4.18	311	7
tolerancja	tolerance	9	RPos	3	3	6.62	5.32	3.88	7.32	139	10
mistrz	master	9	RPos	3	3	7.22	6.24	4.52	4.38	4209	6
patent	patent	9	RPos	3	3	5.92	7.59184	3.52	4.62	221	6
dobytek	property	9	RPos	3	3	6.48	6.76	3.74	3.78	552	7
absolwent	graduate	9	RPos	3	3	6.38	6.56	3.9	3.44	206	9
uczony	scholar	9	RPos	3	3	6.26	7.44	3.58	5.04	1421	6
stypendium	scholarship	9	RPos	3	3	7.06	6.62	4.12	3.16327	372	10
szczyt	peak	9	RPos	3	3	6.44	6.12	4.08	3.28	3533	6
równowaga	balance	9	RPos	3	3	6.08	6.32	3.56	5.38	367	9
oszczędności	savings	9	RPos	3	3	6.68	6.94	3.94	4.4	737	12
płaca	wages	9	RPos	3	3	6.16	6.81633	4.26531	3.26531	63	5
satyra	satire	9	RPos	3	3	6.04	6.16	4.04082	5.1	171	6
lider	leader	9	RPos	3	3	6.22	6.58	4.5	4.06	90	5
zysk	profit	9	RPos	3	3	6.78	6.88	4.18	4.76	651	4

## Sheet: Word Groups Descriptive Statist
			Valence Group
	Factor	Origin Group	Negative		Neutral		Positive		Total
			M	SD	M	SD	M	SD	M	SD
	Valence	Automatic	3.496	0.363334	5.01685	0.556861	6.712	0.346971	5.07495	1.39415
		No particular origin	3.37376	0.361223	5.1902	0.541373	6.384	0.323481	4.98266	1.31707
		Reflective	3.66025	0.345971	5.29654	0.389211	6.49467	0.404225	5.15049	1.23231
		Total	3.51	0.36837	5.16787	0.503696	6.53022	0.377591	5.06936	1.30813
	Origin	Automatic	4.44667	0.53247	4.58221	0.372812	4.33067	0.698237	4.45318	0.548058
		No particular origin	5.40572	0.308305	5.49478	0.302102	5.35793	0.34763	5.41948	0.317841
		Reflective	6.45933	0.296015	6.62645	0.409106	6.62721	0.562458	6.571	0.433786
		Total	5.43724	0.916148	5.56781	0.917364	5.4386	1.09387	5.48122	0.973966
	Concreteness	Automatic	4.3101	1.14761	3.94744	0.743343	4.47741	1.19782	4.24498	1.04949
		No particular origin	4.04682	1.12279	3.95789	1.31706	4.16599	0.73742	4.0569	1.06466
		Reflective	4.17156	1.13043	4.08854	1.16575	4.41124	1.07253	4.22378	1.10641
		Total	4.17616	1.11292	3.99796	1.07906	4.35155	1.00693	4.17522	1.06909
	Arousal	Automatic	4.36933	0.489073	4.148	0.554143	4.28	0.7966	4.26578	0.619818
		No particular origin	4.15205	0.230699	4.12444	0.667555	4.04267	0.510678	4.10639	0.493874
		Reflective	4.32294	0.487831	3.93467	0.467117	4.03374	0.357269	4.09712	0.462073
		Total	4.28144	0.421532	4.06904	0.564137	4.1188	0.582068	4.15643	0.531397
	Freq. of usage	Automatic	656.07	933.411	1066.33	1432.48	1815.13	3423.92	1179.18	2212.63
		No particular origin	2773.53	6497.14	765	964.295	1900.4	2368.86	1812.98	4025.45
		Reflective	645.8	1400.72	2422.13	4785.41	869.53	1272.48	1312.49	3010.66
		Total	1358.47	3918.78	1417.82	2960.82	1528.36	2500.8	1434.88	3159.05
	Num. of letters	Automatic	7.2	2.651	7.47	1.959	7.4	2.414	7.36	2.308
		No particular origin	6.47	2.031	5.27	1.335	6.93	2.017	6.22	1.917
		Reflective	7.07	1.751	6.27	1.624	7.2	2.274	6.84	1.906
		Total	6.91	2.151	6.33	1.859	7.18	2.198	6.81	2.089

## Sheet: Word ANOVAs
	Valence	Origin	Arousal	Concreteness	Frequency of Usage (Natural Logarithms)	Number of letters
Valence, main effect of groups	F(2, 126) = 607.44; p < 0.001; η2 = 0.91	F(2, 126) = 1.27; p = 0.28; η2 = 0.02	F(2, 126) = 1.98; p = 0.14; η2 = 0.03	F(2, 126) = 1.19; p = 0.31; η2 = 0.02	F(2, 126) = 2.30; p = 0.11; η2 = 0.04	F(2, 126) = 2.01; p = 0.14; η2 = 0.03
Origin, main effect of groups	F(2, 126) = 1.88; p = 0.16; η2 = 0.03	F(2, 126) = 254.54; p < 0.001; η2 = 0.80	F(2, 126) = 1.44; p = 0.24; η2 = 0.02	F(2, 126) = 0.40; p = 0.67; η2 = 0.01	F(2, 126) = 1.01; p = 0.37; η2 = 0.02	F(2, 126) = 3.48; p < 0.05; η2 = 0.05
Valence and Origin interaction	F(4, 126) = 2.09; p = 0.09; η2 = 0.06	F(4, 126) = 0.50; p = 0.74; η2 = 0.02	F(4, 126) = 0.52; p = 0.72; η2 = 0.02	F(4, 126) = 0.12; p = 0.98; η2 < 0.01	F(4, 126) = 0.44; p = 0.78; η2 = 0.01	F(4, 126) = 0.82; p = 0.52; η2 = 0.03
